# Supplementary material
Source: PubMed Central journal article supplement (PMC3697382)
Supplement: AAC.02312-12_zac999101925so1.pdf [file AAC.02312-12_zac999101925so1.pdf]

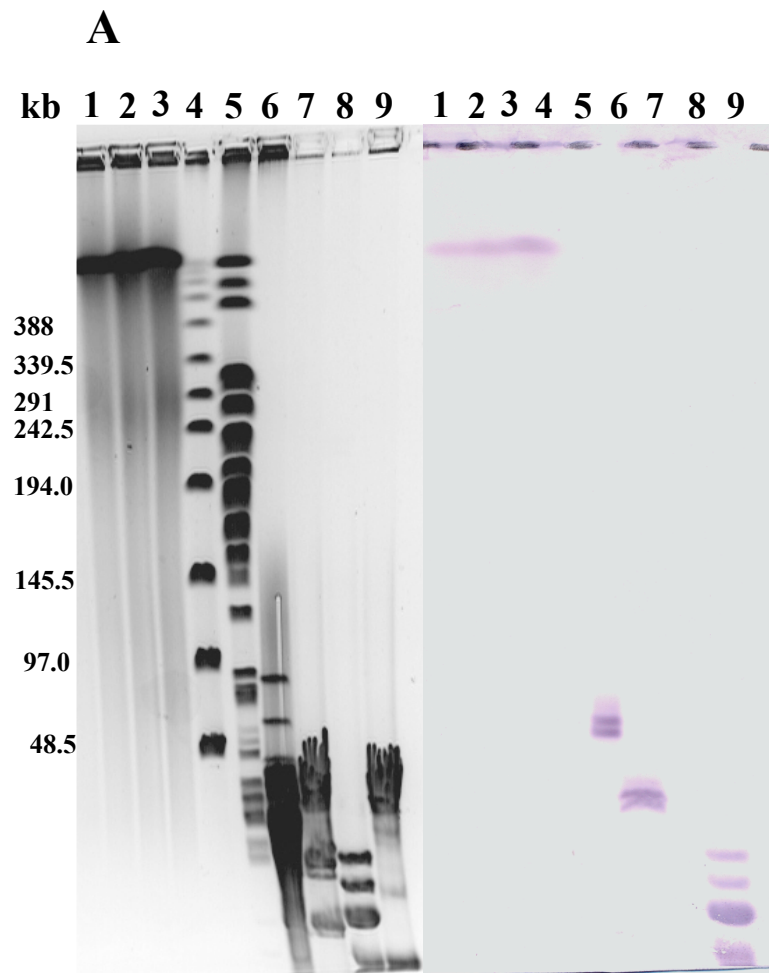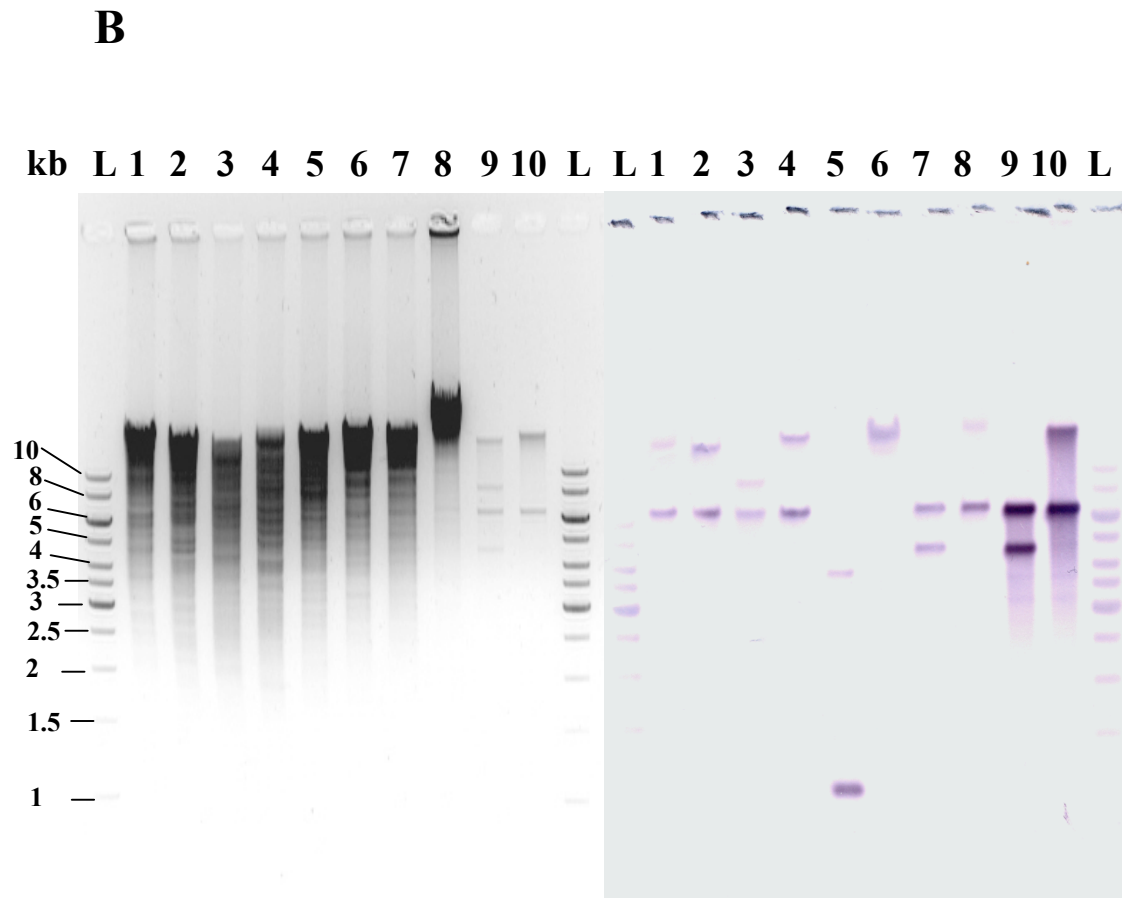

S1. Localization of *bla*<sub>NDM-1</sub> gene in genome of *Pseudomonas aeruginosa* MMA83.

**A** – PFGE DNA hybridization of *P. aeruginosa* MMA83 genome with *bla*<sub>NDM-1</sub> gene probe . Total DNA: nontreated (Lane 1), treated with S1 nuclease 30 min (Lane 2), treated with S1 nuclease 45 min (Lane 3),  $\lambda$  concatamers (New England Biolabs) (Lane 4), *SpeI* (Lane 5), *BamHI* (Lane 6),  $\lambda$  *EcoRI-HindIII* (Fermentas, Lithuania) (Lane 7), 1 kb DNA Ladder (Fermentas, Lithuania) (Lane 8),  $\lambda$  *HindIII* (Fermentas, Lithuania).

**B** – Restriction digestion of *P. aeruginosa* MMA83 total DNA and hybridization with *bla*<sub>NDM-1</sub> gene probe. Total DNA: *NotI* (Lane 1), *KpnI* (Lane 2), *ClaI* (Lane 3), *XhoI* (Lane 4), *EcoRI* (Lane 5), *BamHI* (Lane 6), *XbaI-BamHI* (Lane 7), *XbaI* (8), pLAFRbamNDM digested with *XbaI-BamHI* (9), pLAFRbamNDM digested with *XbaI* (10), L - 1 kb DNA Ladder (Fermentas, Lithuania).
